# **Not dead yet: Diatom resting spores can survive in nature for several millennia.**

Anushree Sanyal<sup>\*1, 2</sup>, Josefine Larsson<sup>1</sup>, Falkje van Wirdum<sup>1</sup>, Thomas Andrén<sup>1</sup>, Matthias Moros<sup>3</sup>, Mikael Lönn<sup>1</sup>, Elinor Andrén<sup>1</sup>.

<sup>1</sup> School of Natural Sciences, Technology and Environmental Studies.

Södertörn University, Alfred Nobels allé 7, SE-14189 Huddinge, Stockholm, Sweden.

<sup>2</sup> Present address: Department of Organismal Biology, Systematic Biology, Norbyvägen 18D, Uppsala University, SE-75236 Uppsala, Sweden.

<sup>3</sup> Leibniz Institute for Baltic Sea Research Warnemünde, Seestraße 15, DE-18119 Rostock. Germany.

\* Author for correspondence: Anushree Sanyal (email: [anushree.sanyal@ebc.uu.se](mailto:anushree.sanyal@ebc.uu.se))

Phone: +46184716471

## 40 **Abstract**

We show for the first time the revival, viability and germination rate of resting spores of the diatom *Chaetoceros* deposited in sub-seafloor sediments from three ages (recent: 0-80 years; ancient: ~1300 and ~7200 calendar year before present. Sanger sequences of nuclear and  
45 chloroplast markers were performed. Our findings showed that ~7200 calendar year BP old *Chaetoceros* resting spores are still viable and the physiological response pertaining to vegetative reproduction in recent and ancient resting spores vary. The time taken to germinate is three hours to 2-3 days in both recent and ancient spores but the germination  
50 rate (%) of the ancient spores decrease with increasing time. Based on the morphology of the germinated vegetative cell we were able to identify the species as *Chaetoceros muelleri*.

Studies of revived resting spores of marine diatoms will serve as excellent proxies of environmental change in marine environments and  
55 enable us to reconstruct ~7000 years of diatom evolution in relation to changes of their environment. Comparison of resurrected populations obtained from these natural archives of diatoms can provide predictive models to forecast evolutionary responses of populations to environmental perturbations from natural and anthropogenic stressors,  
60 including climate change over longer timescales.

Keywords: Resurrection ecology, Diatom, Resting spores, *Chaetoceros*, Germination rate.

65

70

## 75 **Introduction**

Human domination of the Earth's ecosystems has accelerated in recent decades, to the extent that this period has been termed as the Anthropocene (Waters et al. 2016). Phytoplankton forms the basis of the marine food web and hence if we understand how phytoplankton will respond to environmental and  
80 climate change we will have a better chance to understand ecosystem change. Changes in species abundance with increased numbers of planktic, resistant, toxic, and introduced species due to nutrient enrichment and resulting symptoms of eutrophication, hypoxia, metal pollution and acidification (Yasuhara et al. 2012) has resulted in significant loss of biodiversity in the  
85 marine environment. We have very little knowledge about how the Earth's biota will be affected both directly (Hofman et al. 2015) and evolutionary (Larsson et al. 2016; Whitehead 2014) by human-induced climate change, increased pollution and eutrophication. Understanding how the global biodiversity and their adaptive responses will be affected by anthropogenic  
90 perturbations has emerged as a major challenge to humanity (Hofman et al. 2015; Schlüter et al. 2014). Our current inability to do so hampers our understanding of how the future ocean will function.

Resurrection ecologists have long recognized sediments as sources of viable  
95 propagules ("seed or egg or resting spore banks") for studying ecological and evolutionary responses (Cáceres and Hairston 1998). Resting stages in the sediment are of ecological and paleoecological importance as they can be revived when exposed to suitable environmental conditions and used as a source of genetic material for microevolutionary studies (Ellegaard and Ribeiro  
100 2017). Studies predicting how evolution will shape the genetic architecture of populations coping with present and future environmental challenges has primarily relied on investigations through space, in lieu of time. Yet, dormant propagules in sediments are natural archives from which adaptive trajectories of populations could be traced along extended time periods. Currently, only a  
105 century old diatom resting spores have been revived (Härnström et al. 2011), and studies on dinoflagellates have shown that the survival periods of several marine dinoflagellate resting stages ranging from several months to 100 years (Miyazono et al. 2012). Previous studies on *Daphnia* and *Sphagnum* resurrected ~ 700 years old ancient eggs (ephippia) and spores (Yousey et al. 2018, Bu et

110 al. 2017). Hence, we lack a model system to study the changes occurring over longer evolutionary timescales. A key to understanding the adaptive capacities of species over evolutionary time lies in examining the recent and millennia old resting spores buried in the sediments.

115 Resting spore formation in diatoms is an effective strategy to survive periods of stress and has enabled diatoms to withstand events of mass extinction during the end of Cretaceous period (Kitchell et al., 1986). Climate, nutrient concentration, anthropogenic disturbances and physical oceanographic conditions can influence the distribution, composition and abundance of diatom  
120 species (Crosta et al. 1997) and render them a useful probe to study environment induced adaptations over long timescales (Orsini et al. 2013; Burge et al. 2017). Furthermore, DNA sequence data obtained from these natural archives of resurrected organisms, combined with the next generation DNA sequencing methods and models for analyzing both ecological and  
125 population genomic data can help predict the evolutionary responses of natural populations to environmental changes resulting from natural and anthropogenic stressors, including climate change (Orsini et al. 2013).

Globally, *Chaetoceros* is an abundant and diverse marine planktic diatom  
130 genus which plays a major role in marine primary production (Malviya et al. 2016). Studies in the Baltic Sea Area show that the present distribution of *Chaetoceros* species correlates with the salinity gradient resulting in higher diversity in the more marine Kattegatt and Danish straits and lower diversity in the brackish central Baltic Proper and in the nearly freshwater Bothnian Bay  
135 (Andersen et al. 2017; Fig. 1). Due to its dissolution-resistance and a high sedimentation rate (which would result in quick burial of the spores) in the Baltic basin, *Chaetoceros* resting spores are found throughout the sediment stratigraphy from when marine water entered the Baltic proper (named the Littorina Sea, ~7500 years ago) till date (Andrén et al. 2000; Witak et al.,  
140 2011).

The Baltic Sea ecosystem has strong horizontal (salinity, temperature) and vertical (also oxygen) environmental gradients (Snoeijs-Leijonmalm and Andrén, 2017). The vertical salinity gradient results in stratification which

145 together with ongoing eutrophication causes large areas with hypoxic and  
 anoxic (oxygen concentration  $<2$  and  $<0$  mg L<sup>-1</sup>) bottom waters (Carstensen et  
 al. 2014). The Littorina Sea (~7500-3000 cal yr before present (BP)) reached a  
 maximum surface water salinity of 12-13 in the Baltic Proper, compared to  
 present day 5-7.5 (Gustafsson and Westman 2002). The higher salinity  
 150 coincides with the Holocene Thermal Maximum (HTM), with warm and dry  
 climate dated to ~8000-5000 cal yr BP (Seppä et al. 2009). Also, post-  
 deglaciation of Scandinavia, interactions between global sea level rise and  
 isostatic adjustments resulted in different freshwater and brackish water  
 stages, during a geologically and evolutionarily short period of time (Andrén et  
 155 al. 2011; Snoeijs-Leijonmalm and Andrén, 2017).

In the open Baltic Proper, high *Chaetoceros* resting spore abundances are  
 found in the laminated, hypoxic sediments deposited during three time periods:  
 the last century, the Medieval Climate Anomaly (MCA, ~1000-700 cal yr BP,  
 160 Mann et al. 2009) and the HTM (Andrén et al. 2000). The abundances of resting  
 spores in sediments from the Baltic Basin are attributed to high primary  
 production and eutrophication (Andrén et al. 1999; 2000) and also coincides  
 with high temperatures and higher surface water salinities (Zillén et al. 2008),  
 at least during the HTM.

165 To systematically study the effects of anthropogenic perturbations over long  
 time scales we need (1) a model organism whose resting spores have  
 accumulated over a long period of time and (2) its ecosystem where the  
 deposited resting spores have been subjected to anthropogenic perturbations  
 170 over long timescales. The overall objective of the present study is to determine  
 if *Chaetoceros* resting spores preserved in Baltic Sea sediments is a good  
 model system to study the impact of anthropogenic perturbations over long  
 time scales. The specific aims are to examine if the resting spores from three  
 ages (recent, MCA and HTM) can be (i) revived by germinating them (ii) DNA  
 175 extracted, amplified and sequenced, and (iii) identified to species level (since  
 many spores have identical morphology in comparison to germinated living  
 cells). In this study we identify and present a unique model system,  
*Chaetoceros* resting spores from the Baltic Sea, which will help understand the  
 effects of anthropogenic alterations on the evolutionary fate of natural

180 populations on an evolutionarily significant temporal scale instead of spatial scale.

## Materials and Methods

### *Sampling*

185 The Integrated Ocean Drilling Program (IODP) Expedition 347 drilled the Baltic Proper from R/V *Greatship Manisha* during September to November 2013. The M0063 site (58°37.32'N, 18°15.24'E) in the Landsort Deep, the deepest part of the Baltic Proper at a water depth of 437 m was drilled during this expedition (Fig. 1). Five holes (M0063A to M0063E) were drilled, using an advanced piston  
190 corer with perfluorocarbon added in the liner fluid to trace possible contamination, down to a diamicton (till) was reached at about 92 meters composite depth (mcd) (Andrén et al. 2015). The sediments were stored in the dark in a cold room at 4°C. All Expedition 347 cores were split and sub-sampled during the onshore science party at IODP Core Repository in Bremen, Germany,  
195 January to February 2014. Sediment samples used for revival experiments were requested from holes C and D in March 2015 and sub-sampled by the curators at IODP Core Repository in Bremen. The drilling site was revisited in June of 2014 with M/S *Fyrbyggaren* and the topmost unconsolidated sediments were sampled with a 1-m gravity corer. Two cores 87 cm (named M0063H, N58°37.34', E18°15.29') and 63 cm (named M0063I, N58°37.35', E18°15.25')  
200 respectively were retrieved and immediately subsampled in 1-cm slices and stored in the dark in a cold room at 4°C.

### *Lithology and sample selection*

205 The lithology at site M0063 is divided into seven lithostratigraphic units very briefly described as; below 92 mcd diamicton, 92 – 32 mcd laminated clays on cm-scale which gradually change to mixed clays in the upper part, 32 – 26 mcd homogeneous clays with sulphide banding, 26 – 0 mcd organic rich clays with more or less pronounced laminae on mm-scale (Andrén et al. 2015).

210

Based on the results from the onshore science party (Andrén et al. 2015), samples from three sediment sections of different age with anticipated high spore abundance were selected to trace the genetic diversity and the evolutionary changes in the *Chaetoceros* populations: the last century (M0063I

215 0-63 cm), MCA (M0063C 5.42-6.32 mcd) and the HTM (M0063D 21.63-26.05 mcd).

### *Dating and age modelling*

220 The two old selected time intervals corresponding to the MCA (M0063C) and the HTM (M0063D) were dated by radiocarbon accelerator mass spectrometry (AMS) at Beta Analytic, USA.

225 In order to assign a calendar year age to each level analyzed an age-depth modeling was performed using the software CLAM version 2.2 (Blaauw, 2010) with 2000 iterations and a custom-built calibration curve based on the *IntCal13* calibration dataset (Reimer et al. 2013) with a mean and standard deviation of 900 and 500 <sup>14</sup>C years respectively (Obrochta et al. 2017). The sediment surface is assumed to be modern (i.e. 2013, the year of the coring).

230 The youngest sediment (the two short gravity cores M0063H and M0063I), was dated using stratigraphic time markers (Moros et al. 2017). In order to identify stratigraphic time markers, mercury (Hg) and artificial radionuclide (<sup>137</sup>Cs and <sup>241</sup>Am) measurements on M0063H have been performed. Core correlation of M0063H and M0063I is based on characteristic features of the mercury  
235 downcore profiles. Hg and <sup>137</sup>Cs were normalized to bulk organic carbon (TOC) in order to eliminate the dilution effect of the massively occurring manganese-carbonate layers.

### *Resting spore concentration*

240 To calculate the concentration of resting spores in the upper 30 m (mcd) from hole M0063D, sediments were freeze-dried, and a known weight of sediment (on average ~0.1 g) was subsampled. Cleaning of diatoms were performed according to standard procedures (Battarbee 1986). Microspheres were added in the last step to allow for the calculation of resting spore concentrations  
245 before mounting for permanent slides in Naphrax™ (Battarbee and Kneen 1982). A total of 54 samples were analyzed for diatom spores using light microscopy at 1000x magnification and immersion oil. Due to the difficulties in differentiating between the morphology of *Chaetoceros* resting spores, they were not separated to species level. Concentrations of *Chaetoceros* resting



250 spores were calculated and expressed in numbers of valves per gram dry weight (gdw) (Battarbee and Kneen, 1982).

*Single resting spore isolation from several millenia old resting spores.*

Resting spores were isolated from recent sediment samples (~the last century)  
 255 as well as from MCA and HTM ages. The isolation procedure was modified from Throndsen (1978) where each sample was diluted with ~1ml of sterile ddH<sub>2</sub>O in a 30mm x 15mm petri dish and a drop of the solution was placed on a concave microscope slide. Individual resting spores were isolated through manual suction using 20–40 µl drawn-out disposable pipettes and examined on a  
 260 concave microscopic slide under an inverted microscope with a 10x objective and a WF40x eyepiece with a total magnification of 400x. The isolated resting spore possibly with associated contaminants was transferred to a new ddH<sub>2</sub>O water droplet. This isolation and transfer was repeated 2–5 times to remove any contaminants. Individual resting spores were then isolated for the final  
 265 time and transferred to a 30mm x 15mm petri dish containing artificial seawater medium (Tropic marine® Wartenberg, Germany).

*Germination and germination rate of the recent and several millenia old resting spores*

270 The resting spores from the last century, MCA and HTM ages were germinated in 30mm x 15mm petri dishes containing artificial seawater medium with salinities ranging from ~10.5 to ~11 at temperatures ranging between 15 to 18°C.

275 The germination rates of the resting spores were estimated by counting the number of germinated spores that germinated in a field of the microscope. The germination rate observed in 12 to 21 microscopic fields were recorded for each sample at a total magnification of 400X. The average germination rate for the recent and ancient resting spores were calculated. The germination rate  
 280 was analyzed using a one-way ANOVA with the age of the resting spores as the fixed effect and the germination rate as the dependent variable using R (R Core Team, 2017).



## 285 *Growing the unialgal Chaetoceros cultures*

Unialgal cultures of *Chaetoceros* from revived individual resting spores from the last century were established from an inoculum from the petri dish which was transferred to a 50 ml angled neck Nunc<sup>®</sup> EasY Flasks<sup>™</sup> with vent caps. The flasks were filled with the Guillard's (F/2) Marine Water Enrichment Solution  
290 which contained silicate and grown in growth chambers with controlled temperature (15 -18°C) and a 12:12 light-dark regime. The culture media was prepared by adding 20 ml of the Guillard's F/2 medium in 1L of artificial seawater. The light intensity was 125  $\mu\text{E m}^{-2} \text{s}^{-1}$  and was provided by fluorescent lamps. The cultures were subcultured every two weeks to maintain the culture.

295

## *Identification of the Chaetoceros species*

The germinated *Chaetoceros* species was cleaned in hydrogen peroxide according to the method described in Battarbee (1986), dried onto a coverslip and mounted in Naphrax<sup>™</sup> (refraction index  $n_D=1.73$ ). Qualitative analysis was  
300 carried out with an Olympus BX51 light microscope using Nomarski differential interference contrast with a magnification of 1000x and oil immersion. Diatom species identification followed Cleve-Euler (1951), Ishii et al. (2011), Johansen and Rushforth (1985) and Krammer and Lange-Bertalot (1991).

## 305 *DNA isolation from diatom cultures of recent resting spores*

Total DNA was extracted from each *Chaetoceros* culture (based on revived spores from the last century) as described below. 25 ml of the cell cultures were centrifuged at 2500 rpm for 10 min in a 50 ml Falcon tube, 20 ml of the supernatant was discarded using a syringe. The remaining 5 ml were  
310 centrifuged again at 2500 rpm for 5 min. 4 ml of the supernatant was discarded. The remaining 1 ml was spun for 2 minutes. The supernatant was discarded. Genomic DNA was extracted using a modified chloroform method with the addition of cetyltrimethylammonium bromide (CTAB) as describe by Zuccarello and Lokhorst (2005). The culture pellet was grinded with microfuge pestle in 500  $\mu\text{l}$  of CTAB extraction buffer (2% CTAB, 0.1 Tris-HCl (pH 8.0), 1.4 M NaCl, 20 mM EDTA, 1% PVP), 2  $\mu\text{l}$  RNase A (100mg/ml) and 5  $\mu\text{l}$  Proteinase K (20 mg/ml) and the tubes were incubated at 55-60°C for 30 min. Equal volume of chloroform:isoamyl alcohol (24:1) was added and mixed. The tubes were

then spun at 12,000 g for 5-10 min. The supernatant was removed to a new  
 320 tube, avoiding interface. This step was repeated. DNA was precipitated in 100%  
 ice-cold isopropanol, each tube was inverted and placed at room temperature  
 for 30 min. The tubes were spun for 20 min at 12,000 g. The DNA pellet was  
 washed in 500  $\mu$ l of 70% ethanol and the tubes were spun for 5 min. The  
 supernatant was poured out and the DNA pellet was air-dried. The DNA pellet  
 325 was suspended in 50  $\mu$ l of 0.1 X (0.1mM EDTA, 1 mM Tris) TE buffer. The quality  
 of the DNA extraction was assessed by visualizing the products on a 1.5%  
 agarose gel and the DNA concentration was evaluated with a nanodrop. The  
 DNA was then frozen at -80°C for subsequent PCR and sequencing reactions.

### 330 *DNA isolation from single millenia old Chaetoceros resting spores*

Single cell Chelex® DNA extraction was performed on spores which were  
 obtained from the sediments of MCA age by using the Chelex method. For DNA  
 extraction, Chelex-stored samples were incubated for 20 min at 95°C. They  
 were then vortexed for 15 s and centrifuged for 15 s at 12,000 g. DNA  
 335 extraction from the germinated resting spores of the HTM age will be done in a  
 future study.

### *PCR and sequencing*

For the PCR reaction, 25  $\mu$ L of reaction mixture contained as a final  
 340 concentration, the two primers at 15 pmole each; 5-20 ng DNA template; 0.2  
 mM each dATP, dCTP, dGTP and dTTP; 2.5  $\mu$ L of 10 $\times$ PCR buffer for Blend Taq  
 (25 mM MgCl<sub>2</sub> concentration); and 0.1 units of Blend Taq polymerase (Thermo  
 Scientific). The PCR condition was as follows: an initial step at 94°C for 2 min  
 followed by 30 cycles with a denaturation temperature of 94°C for 30 s, an  
 345 annealing temperature of 53°C for 30 s and an extension temperature of 72°C  
 for 1.5 min. The PCR was assessed by visualizing the products on 1.5% agarose  
 gel. Six primer pairs from nuclear ribosomal RNA (SSU) and chloroplast DNA  
 (*rbcL*) from three unialgal cultures were amplified (Table 3). Sanger sequencing  
 was performed on the PCR products (Macrogen inc.) of six nuclear ribosomal  
 350 RNA (small (SSU) and chloroplast DNA (*rbcL*) markers which was used to  
 amplify *Chaetoceros* species (Lee et al. 2013) (Table 3).

## Analysis of DNA sequences

355 The sequences were blasted using the nucleotide BLAST tool of NCBI. Sequences were aligned by using Molecular Evolutionary Genetics Analysis version 5 (MEGA5) (Table 3).

## Results

360

### Dating and age modelling

Two sediment samples of MCA age and four samples of HTM age were radiocarbon dated (Table 1) and used for age modelling to assign an age to all individual samples used for the resurrection study (Table 2). Radiocarbon  
365 dating together with stratigraphic time markers for the youngest sediment (Fig. 3) showed that our samples were from three distinct time intervals from present time (0 years) to 7200 cal yr BP. The sediment from the short gravity core M0063I with an anticipated age of the last century could be assigned an age of ca. 1940-1935 (i.e. ~0 - 80 years) at 63 cm, based on the stratigraphic  
370 time markers identified (Fig. 3). The sediment samples used for the resurrection study gave after age modelling ages of ~1300-1000 cal yr BP from MCA age (M0063C 5.42-6.32 mcd) and 7200-6000 cal yr BP of HTM age (M0063D 21.63-26.05 mcd) (Table 2). Age modelling made it possible to estimate the calendar years age for all levels analyzed except for the sample at 6.32 mcd which was  
375 outside the dated interval. A linear extrapolation from the sample at 6.22 mcd was used to estimate the age of this sample (Table 2).

### Resting spore concentration across evolutionary timescales

We reconstructed the *Chaetoceros* spp. resting spore concentrations and  
380 observed that the highest concentration (~203 million resting spores per gram dry weight of sediment at 26 mcd) in the sediments deposited during the HTM, after which concentrations decreased gradually with distinct peaks during MCA and present time (Fig. 4). Preservation of diatom valves were very poor between ~21 and 8.5 mcd, however the heavily silicified resting spores were  
385 still found in some of the sediment samples in this section, but concentrations were relatively low. Due to possible dissolution, reconstructed concentrations might not be accurate in this section. During the MCA age, resting spore concentrations increased to ca. 185 million at ca. 5.5 mcd, following which

concentrations decreased again. The most recently deposited sediments revealed a pronounced increase in *Chaetoceros* sp. resting spore concentration (~146 million/gdw). The high spore concentration in the recently deposited sediments is only comparable to the concentrations found during the HTM and MCA in our record.

#### 395 *Germination of recent and millenia old resting spores*

We revived resting spores from the three time periods; (0-80 years (last century), 1300-1000 cal yr BP (MCA) and ~7200-6000 cal yr BP (HTM). The environmental conditions were recreated to germinate the resting spores from the three ages which included reconstructing the salinity and temperature conditions. The germination of *Chaetoceros muelleri* was observed to be consistent and dominant at temperatures ranging from 15 – 18°C and at a salinity of (~10.5-11) (Fig. 5A). On an average the time taken for the resting spores to germinate ranged from three hours to 2 -3 days.

#### 405 *Germination rate and viability of recent and millenia old resting spores*

The number of resting spores which germinated from the three time periods (0-80 years (last century), 1300-1000 cal yr BP (MCA) and ~7200-6000 cal yr BP (HTM) varied. A greater number of the younger (~0-80 calendar years and 1300-1000 cal. yr BP) resting spores germinated as compared to the oldest (~7200-6000 cal yr BP) resting spores. On an average, the percent germination rate of the recent resting spores were the highest at  $41 \pm 8.7$  (mean  $\pm$  SE,  $n = 22$ ) while the germination rate of the resting spores of the MCA and HTM ages were  $31 \pm 8.9$  (mean  $\pm$  SE,  $n = 12$ ) and  $12 \pm 6.7$  (mean  $\pm$  SE,  $n = 5$ ), respectively (Fig. 5B). A significant difference in the germination rate of the recent and ancient spores ( $P = 0.0006$ ,  $F = 9.22$ ) was found.

#### 415 *Physiology and reproduction of the recent and millenia old resting spores*

The resting spores isolated from the last century (0 – 80 years) reproduced and could be grown in culture but the old spores (~1300-1000 and ~7200-6000 cal yr BP) of the MCA and HTM age germinated but could not be grown in cultures. The time taken for the recent and ancient spores were the same ranging from three hours to 2 to 3 days, but the germination rate (%) of the ancient spores decreased with increasing time (see section on germination rate) (Fig. 5B).

## *Identification of the Chaetoceros species*

425 We identified the germinated *Chaetoceros* resting spores that we were able to culture as *Chaetoceros muelleri* Lemmermann (Fig. 6). *Chaetoceros muelleri* unlike other *Chaetoceros* taxa is a solitary living species with their vegetative cells characterized by a convex or flat valve surface (Fig. 2A-H), and their resting spores smooth with one valve bowed and the other protruded and  
430 truncated (Johansen and Rushforth 1985). The above characteristics also fit with the resting spores found in the culture (Fig. 2 A-H). The taxa has been reported from brackish waters in Europe and North America (Johansen and Rushforth 1985; Guiry 2017). In the checklist of Baltic Sea Phytoplanktic species; *C. muelleri* is recorded in nearly all subareas and considered a warm  
435 water species found in low salinity and mainly eutrophic waters (Hällfors 2004).

## *Extraction and amplification of DNA from unialgal cultures of recent resting spores*

We extracted high quality DNA with concentrations ranging from ~100 to  
440 235ng/ul with a A260/A280 ratio of ~1.7 to 2 from the cultures of the germinated resting spores of the last century (~0 - 80 years). We amplified six primer pair combinations from rRNA (SSU) molecules and chloroplast genes (*rbcL*) from three unialgal cultures (Tables 3).

## *Extraction and amplification of DNA from germinated single cells of millenia old resting spores*

Single cell Chelex® DNA extraction on the older spores (~1300-1000 cal yr (MCA age)) with a A260/A280 ratio of ~1.7 to 2 was done. DNA amplification was done using chloroplast (*rbcL*) and rRNA (SSU) markers.

450

## *Sanger sequencing of DNA from unialgal cultures of recent resting spores*

Partial sequences for chloroplast genes, *rbcL* (~ 403- 980 bp) and rRNA molecules, SSU (406-550 bp) were obtained by Sanger sequencing for three sediment revived resting spore populations of *Chaetoceros* (Fig. 6), the  
455 sequences for the remaining genes were not obtained (Table 3). Sequence alignment and blast results of the nuclear ribosomal RNA (small subunit [SSU]) confirmed that the sequences were from the *Chaetoceros* species. Blast searches using the new sequences resulted in matches consistent with the

genus-level morphological identifications of our specimens. Our validation of  
 460 methods in three unialgal cultures showed no differences in the overall  
 sequences and alignments.

## Discussion

This study demonstrated the (i) successful germination and the germination  
 465 rate of recent (~0-80 years) and ancient resting spores (~7200-1000 cal yrs  
 BP) (Figs. 5A-B) (ii) DNA extraction and amplification from unialgal cultures of  
 the recent spores (~0-80 years) and the single cells of millennia old (~1300-  
 1000 cal yr BP) sediment revived resting spores (iii) DNA sequences from  
 unialgal cultures of the recent spores (Fig. 6), and (iv) a method to identify the  
 470 species (*Chaetoceros muelleri*) from the morphology of viable germinated  
 resting spores (Fig. 2) useful in the fields of microevolutionary,  
 micropaleontology and paleoecology studies.

By reviving resting spores deposited in sediments and extracting DNA from  
 475 them we have demonstrated that *Chaetoceros muelleri* resting spores provide  
 a promising model system for understanding species adaption and evolution  
 across geological timescales and address questions about the impact of  
 human-induced perturbations on life on Earth. Furthermore, previous attempts  
 to use resting spores for paleoenvironmental reconstructions by assigning them  
 480 to species met with limited success as most of the resting spores are hard to  
 classify (Ishii et al. 2011; Witak et al. 2011), severely hindering our  
 understanding of paleoproductivity and the effect of environmental change on  
 species. We revived several *Chaetoceros* species but we cultured only *C.*  
*muelleri* in this study. Resting cells of diatoms are virtually identical to  
 485 vegetative frustules in thickness as well as shape and pattern (McQuoid and  
 Hobson, 1996). Previous studies on the diatom *Skeletonema* have shown that  
 the morphology of the resting cells and germinated cells is indistinguishable  
 (Itakura et al. 1992), whereas the resting and germinated spores of  
*Chaetoceros* species can be distinguished based on morphology. Therefore, the  
 490 ability to identify *Chaetoceros* species from the morphology of viable  
 germinated recent and ancient resting spores of *Chaetoceros* will improve the  
 scope of paleoecological studies (Witak et al. 2011).



To the best of our knowledge this is the first study reviving thousands of years  
 495 old (~7200-1000 cal yr BP) diatoms from dated sediments. Previous studies on  
 the diatom *Skeletonema marinoi* showed that the sediments were dated to be  
 a century old (Härnström et al. 2011). Other studies on the persistence of  
 diatoms in marine sediments have reported germination of viable resting  
 stages from sediment layers ~30-40 cm below the sediment surface which  
 500 were estimated to be 175-275 years old (based on the sedimentation rates of  
 1.2-1.5 mm per year) (Stockner and Lund 1970).

Interestingly, our results indicate a different germination rate compared to the  
 diatom species *Skeletonema marinoi*. The germination of resting spores of  
 505 *Skeletonema marinoi* from sediment layers older than a few decades can take  
 weeks to months (Härnström et al. 2011) while the recent and ancient  
*Chaetoceros muelleri* spores in this study germinated in three hours to two to  
 three days, which is a surprising and promising result. However, it was  
 observed that although the time (three hours to 2-3 days) taken for the recent  
 510 and ancient resting spores to germinate remains the same the germination rate  
 (% of germination) of the ancient spores decrease with increasing time (Fig.  
 5B). We also found that the older spores (~1000-1300 cal yrs BP) could be  
 germinated but could not be grown in cultures. It is possible that the older  
 spores had the ability to survive but were unable to reproduce. The lower  
 515 metabolic activity in the ancient spores indicates towards a trade-off between  
 the longevity and viability of the spores and reproductive ability of the spores.  
 The germination rates did vary significantly ( $P = 0.0006$ ) between the different  
 ages (Fig. 4B), which also suggests that just to remain viable over thousands of  
 years has been a challenge for the species. The anoxic condition in the  
 520 Landsort Deep possibly reduced their metabolic activity through time and  
 helped in preserving the spores (Fig. 4). Also, it's possible that the genetic and  
 hence the physiological changes due to climatic or environmental changes over  
 a thousand years could have affected its ability to reproduce.

525 The successful DNA extraction and amplification from unialgal cultures of the  
 recent spores (~0-80 years) and DNA extraction of the single cells of millennia  
 old (~1300-1000 cal yr BP) sediment revived resting spores reveals that the  
 DNA in the sediment revived resting spores are well-preserved and hence



presents itself as an excellent model system for tracing the evolutionary history  
 530 of species. The amplification and Sanger sequencing of the plastid-encoded  
 rbcL (~403- 980 bp) and nuclear-encoded SSU rRNA gene (406-550 bp) from  
 the cultures show the possibilities for further studies. The non-existing variation  
 within this genomic region was expected as this is a slow evolving region  
 (Patwardhan et al. 2014) and was mainly used for species identification and  
 535 PCR-amplification control.

Previous studies especially in humans has revealed that despite treatment of  
 the laboratory equipment with bleach, UV irradiation of the entire facility,  
 protective clothing and face shields and other routine precautions,  
 540 contamination is a continuous threat, if for no other reason than because the  
 specimens themselves might be contaminated with modern DNA (Hofreiter et  
 al., 2001). Hence, the availability of high quality DNA from sediment revived  
 recent and ancient spores in a system so well preserved where the chances of  
 contamination are minimal as opposed to systems like humans is like a dream  
 545 come true and provides immense potential for future microevolutionary  
 studies. In this study precaution against contamination was taken in every step  
 from sampling to PCR, by using perfluorocarbon added in the liner fluid to trace  
 possible contamination when sampling the long cores and no contamination  
 was detected. These cores were carefully subsampled by the curators at IODP  
 550 Core Repository in Bremen and single spores were isolated with care following  
 the protocol of Throndsen (1978). For the DNA extraction and amplification care  
 was taken to avoid contamination; preparations were conducted in PCR-free  
 environment.

555 The findings of this study reveal the potential of identifying more markers,  
 assembling a complete genome, making comparisons of populations across  
 temporal and spatial scales genetically with sediment revived recent and  
 ancient spores but also experimentally with recent spores. Adequate  
 comprehensive studies of population genetic structure in phytoplanktic species  
 560 along environmental gradients like salinity combined with experimental data  
 are lacking and the results in this study creates this opportunity. A previous  
 study has shown that Baltic Sea populations displayed reduced genetic  
 diversity compared to North Sea populations. The study also showed significant

differences in the growth of low and high native salinity isolates indicating local  
 565 salinity adaptation (Sjöqvist et al. 2015). Here we show that it will be possible  
 to examine the genetic diversity and evolutionary changes in *Chaetoceros*  
 populations across evolutionary timescales: ~80 years (last century), ~1300-  
 1000 cal yr BP (MCA) and ~7200-6000 cal yr BP (HTM) from sediments drilled  
 in the Landsort Deep. Future studies can include identification of genetic  
 570 markers and differences in gene expression levels to determine the changes in  
 the population genetic structure across environmental gradients over time in  
 sediment revived *Chaetoceros* populations. Population genomics studies using  
 DNA data obtained from modern DNA technologies and single cell genomics  
 together can be used to understand the evolutionary changes in the species  
 575 due to natural environmental change and/or climate change or anthropogenic  
 effects and to gain insights into the mechanisms of molecular evolution.

In conclusion, this study presents a new model system using *Chaetoceros*  
*muelleri* to address the important topic of adaptive evolution in marine species  
 580 due to climate and environmental change induced by anthropogenic  
 perturbations across evolutionary timescales. Our study reports (1) the revival,  
 viability and germination rate of recent (0-80 years) to ancient (~7200 - ~1000  
 calendar years BP old) resting spores of *Chaetoceros muelleri* (2) the extraction  
 of DNA and amplification of chloroplast and ribosomal genes from recent spores  
 585 and DNA extraction from ancient resting spores of *C. muelleri* (3) Radiocarbon  
 dating along with stratigraphic time markers to determine age of sediments (4)  
 Identification of the species by reviving the resting spores (5) Baltic Sea an  
 excellent ecosystem to study long-term effects of environment on species  
 adaptation.

590

## Acknowledgement

We thank the captain and crew of R/V *Greatship Manisha* and M/S *Fyrbyggaren*,  
 as well as the IODP Expedition 347 science party. Part of the sediment samples  
 for this study were provided by IODP. We also thank Dr. Lubna Elabbas for  
 595 assistance in the lab and Asst. Prof. Sunčica Bosak, University of Zagreb for  
 help with species identification of *Chaetoceros muelleri*. Prof. Martin Jakobsson  
 at Stockholm University generously made the Baltic Sea map available for our  
 use.

## 600 **References**

- Andersen, J.H., J. Cartensen, D. J. Conley, K. Dromph, V. Fleming-Lehtinen, B. G. Gustafsson, et al. 2017. Long-term temporal and spatial trends in eutrophication status of the Baltic Sea. *Biological Reviews* 92: 135–149.
- Andrén, E., T. Andrén, and H. Kunzendorf. 2000. Holocene history of the Baltic  
605 Sea as a background for assessing records of human impact in the sediments of the Gotland Basin. *The Holocene* 10: 687-702.
- Andrén, E., G. Shimmield, and T. Brand. 1999. Changes in the environment during the last centuries on the basis of siliceous microfossil records from the southwestern Baltic Sea. *The Holocene* 9: 25-38.
- 610 Andrén, T., S. Björck, E. Andrén, D.J. Conley, L. Zillén, and J. Anjar. 2011. The development of the Baltic Sea basin during the last 130 ka. In: Harff J, Björck S, Hoth P (eds) *The Baltic Sea basin*. Springer, Berlin, pp 75–97.
- Andrén, T., B.B. Jørgensen, C. Cotterill, and S. Green. 2015. the Expedition 347 Scientists Proceedings IODP 347: College Station, TX (Integrated Ocean Drilling  
615 Program). doi:10.2204/iodp.proc.347.107.2015.
- Battarbee, R. W. 1986. Diatom analysis. In BE Berglund (Ed.), *Handbook of Holocene palaeoecology and palaeohydrology*. Chichester: Wiley.
- Battarbee, R.W, and M. J. Kneen. 1982. The use of electronically counted microspheres in absolute diatom analysis. *Limnology and Oceanography* 27:  
620 184–188.
- Blaauw, M. 2010. Methods and code for 'classical' age-modelling of radiocarbon sequences. *Quaternary Geochronology* 5: 512-518.
- Bu, Z-J., S. Sundberg, L. Feng, H-K Li, H-Y Zhao, H-C Li. 2017. The Methusaleh of plant diaspores: Sphagnum spores can survive in nature for centuries. *New  
625 Phytologist* 214: 1398-1402.
- Burge, D.R.L., M. B. Edlund, and D. Frisch. 2017. Paleolimnology and resurrection ecology: The future of reconstructing the past. *Evolutionary Applications* 11: 42-59.
- Cáceres, C. E., and N. G. Hairston. Jr. 1998. Benthic-pelagic coupling in planktonic crustaceans: The role of the benthos. *Ergebnisseder Limnologie* 52:  
630 163–174.

- Carstensen, J., J. H. Andersen, B. G. Gustafsson, and D. J. Conley. 2014. Deoxygenation of the Baltic Sea during the last century. *Proceedings of the National Academy of Sciences of the United States of America* 111: 5628–5633.
- 635 Cleve-Euler, A. 1951. *Die Diatomeen von Schweden und Finnland*. Kungliga Vetenskapsakademiens Handlingar 4:e serien 2:1, 163 pp.
- Crosta, X., J. J. Pichon, and M. Labracherie. 1997. Distribution of *Chaetoceros* resting spores in modern peri-Antarctic sediments. *Marine Micropaleontology* 29: 283–299.
- 640 Ellegaard, M, and S. Ribeiro. 2017. The long-term persistence of phytoplankton resting stages in aquatic ‘seed banks’. *Biological Reviews* doi: 10.1111/brv.12338.
- Guiry. M. D. 2017. In Guiry MD, Guiry GM. *AlgaeBase*. World-wide electronic publication, National University of Ireland, Galway. <http://www.algaebase.org>;
- 645 searched on 26 June.
- Gustafsson, B. G., and P. Westman. 2002. On the causes for salinity variations in the Baltic Sea for the last 8500 years. *Paleoceanography* 17: 1–14.
- Hällfors. G. 2004. Checklist of Baltic Sea Phytoplankton Species (including some heterotrophic protistan groups). *BSEP* 95: 208 pp.
- 650 Hårnström, K, M. Ellegaard, T. J. Andersen, and A. Godhe. 2011. Hundred years of genetic structure in a sediment revived diatom populations. *Proceedings of the National Academy of Sciences of the United States of America* 108: 4252–4257.
- 655 Hofman, C. A., T. C. Rick, R. C. Fleischer, and J. E. Maldano. 2015. Conservation archaeogenomics: ancient DNA and biodiversity in the Anthropocene. *Trends in Ecology & Evolution* 30: 540–549.
- Hofreiter, M., D. Serre, H. N. Poinar, M. Kuch, and S. Pääbo. 2001. Ancient DNA. *Nature Reviews* 2: 353–359.
- 660 Ishii K-I., M. Iwataki, K. Matsuoka, and Imai I. 2011. Proposal of identification criteria for resting spores of *Chaetoceros* species (Bacillariophyceae) from a temperate coastal sea. *Phycologia* 50: 351–362.
- Itakura, S., I. Imai, and K. Itoh. 1992. Morphology and rejuvenation of *Skeletonema costatum* (Bacillariophyceae) resting cells from the bottom
- 665 sediments of Hiroshima bay, the Seto inland sea, Japan. *Bulletin of Plankton Society of Japan* 38: No. 2. pp. 135–145.

- Johansen, J. R., and S.R. Rushforth. 1985. A contribution to the taxonomy of *Chaetoceros muelleri* Lemmermann (Bacillariophyceae) and related taxa. *Phycologia* 24: 437-447.
- 670 Kitchell, J.A., D.L. Clark, and A. M. Gombos Jr. 1986. Biological Selectivity of Extinction: A Link between Background and Mass Extinction. *PALAIOS* 1: 504-511.
- Krammer, K., and H. Lange-Bertalot. 1991. Bacillariophyceae, 3. Teil Centrales, Fragilariaceae, Eunotiaceae. In: Ettl, H., Gerloff, J., Heynig, H. and Mollenhauer, D. (Eds) *Süsswasserflora von Mitteleuropa*. Gustav Fischer Verlag, Stuttgart. 576 pp.
- 675 Larsson, J., M. Lönn, E. E. Lind, J. Swiezak, K. Smolarz, and M. Grahn. 2016. Sewage treatment plant associated genetic differentiation in the blue mussel from the Baltic Sea and Swedish west coast. *PeerJ* 4: e2628.
- 680 Lee, M-A., D. G. Faria, M-S. Han, J. Lee, J-S. Ki. 2013. Evaluation of nuclear ribosomal RNA and chloroplast gene markers for the DNA taxonomy of centric diatoms. *Biochemical Systematics and Ecology* 50: 163-174.
- Malviya S., E. Scalco, S. Audic, F. Vincent, A. Veluchamy, J Poulain, et al. 2016. Insights into global diatom distribution and diversity in the world's ocean. *Proceedings of the National. Academy of Sciences of the United States of America* 113: E1516 – E1525.
- 685 Mann, M.E. Z. Zhang, S. Rutherford, R. S. Bradley, M. K. Hughes, D. Shindell, et al. 2009. Global signatures and dynamical origins of the Little Ice Age and Medieval Climate Anomaly. *Science* 326: 1256-1260.
- 690 McQuoid MR, Hobson LA. 1996. Diatom resting stages. *Journal of Phycology* 32: 889-902.
- Miyazono, A., S. Nagai, I. Kudo, K. Tanizawa. 2012. Viability of *Alexandrium tamarense* cysts in the sediment of Funka Bay, Hokkaido, Japan: Over a hundred year survival times for cysts. *Harmful Algae* 16, 81-88.
- 695 Moros, M., T. J. Andersen, D. Schulz-Bull, K. Häusler, D. Bunke, I. Snowball, et al. 2017. Towards an event stratigraphy for Baltic Sea sediments deposited since AD 1900: approaches and challenges. *Boreas* 46: 129-142.
- Obrochta, S.P. T. Andrén, S. Z. Fazekas, B. C. Loughheed, I. Snowball, Y. Yokoyama, et al. 2017. The undatables: Quantifying uncertainty in a highly expanded Late Glacial-Holocene sediment sequence recovered from the
- 700

- deepest Baltic Sea basin—IODP Site M0063. *Geochemistry Geophysics Geosystems* 18: 858-872.
- Orsini, L., K. Schwenk, L. De Meester, J. K. Colbourne, M. E. Pfrender, and L. J. Weider. 2013. The evolutionary time machine: Forecasting how populations can adapt to changing environments using dormant propagules. *Trends in Ecology & Evolution* 28: 274–282.
- Patwardhan, A., S. Ray, and A. Roy. 2014. Molecular Markers in Phylogenetic Studies-A Review *J Phylogenetics Evol Biol* 2(2): 131.
- Reimer, P.J., E. Bard, A. Bayliss, and J. W. Beck. 2013. IntCal13 and Marine13 radiocarbon age calibration curves, 0-50,000 years cal BP. *Radiocarbon* 55: 1869-1887.
- R Core Team. (2014). R: A language and environment for statistical computing. R Foundation for Statistical Computing, Vienna, Austria. URL <http://www.R-project.org/>.
- Schlüter, L. K. T. Lohbeck, M. A. Gutowska, J. P. Gröger, U. Riebesell, and T. B. H. Reusch. 2014. Adaptation of a globally important coccolithophore to ocean warming and acidification. *Nature Climate Change* 4: 1024-1030.
- Seppä, H., A. E. Björne, R. J. Telford, H. J. B. Birks, and S. Veski. 2009. Last nine-thousand years of temperature variability in Northern Europe. *Climate of the Past* 5: 523–535.
- Sjöqvist, C., A. Godhe, P. R. Jonsson, L. Sundqvist, A. Kremp. 2015. Local adaptation and oceanographic connectivity patterns explain genetic differentiation of a marine diatom across the North Sea Baltic Sea salinity gradient. *Molecular Ecology* 24: 2871–2885.
- Snøeijs-Leijonmalm, P., and E. Andrén. 2017. Why is the Baltic Sea so special for organisms to live in? *Biological Oceanography of the Baltic Sea*. In: Snøeijs-Leijonmalm, P., Schubert, H. & Radziejewska, T. (eds). Springer, Dordrecht, 23-84 pp.
- Stockner, J.G., and J.W.G. Lund. 1970. Live algae in postglacial sediments. *Limnology and Oceanography* 15: 41-58.
- Thronsen, J. 1978. Preservation and storage. In: Sournia A (ed ) *Phytoplankton manual*. UNESCO, Paris, pp. 69-74.
- Waters, C. N., J. Zalasiewicz, C. Summerhayes, A. D. Barnosky, C. Poirier, A. Gałuszka, et al. 2016. The Anthropocene is functionally and stratigraphically distinct from the Holocene. *Science* 351: 137-147.

- Whitehead, A. 2014. Evolutionary genomics of environmental pollution. In: Landry, Aubin-Horth, eds. Ecological Genomics. Netherlands: Springer, 321-337.
- Witak, M., J. Dunder, and M. Leśniewska. 2011. *Chaetoceros* resting spores as  
740 indicators of Holocene paleoenvironmental changes in the Gulf of Gdańsk, southern Baltic Sea. Oceanological and Hydrobiological Studies 40: 21-29.
- Yasuhara, M., G. Hunt, D. Breitburg, A. Tsujimoto, and K. Katsuki. 2012. Human-induced marine ecological degradation: micropaleontological perspectives. Ecology and Evolution 2: 3242–3268.
- 745 Yousey, A.M., P. Roy Chowdhury, N. Biddinger, J. H. Shaw, P. D. Jeyasingh, and L. J. Weider. 2018. Resurrected ‘ancient’ *Daphnia* genotypes show reduced thermal stress tolerance compared to modern descendants. R Soc Open Sci 5(3); 172193.
- Zillén, L., D. J. Conley, T. Andrén, E. Andrén, and S. Björck. 2008. Past  
750 occurrences of hypoxia in the Baltic Sea and role of climate variability, environmental change and human impact. Earth-Science Reviews 91: 77-92.
- Zuccarello, G.C., and G. M. Lokhorst. 2005. Molecular phylogeny of the genus *Tribonema* (Xanthophyceae) using rbc L gene sequence data: monophyly of morphologically simple algal species. *Phycologia* 44: 384-392.



## Figure captions and legends.

Fig. 1. Map showing the position of the investigated IODP Expedition 347 site M0063 in the Landsort Deep (58°37.32'N, 18°15.24'E) where a ca 116 m long sediment core was drilled at a water depth of 437 m (Andrén et al. 2015). Baltic Sea has a long salinity gradient in the surface waters ranging from ~12-30 in Kattegatt, ~10-23 in Danish straits (Ds), ~8-11 in Arkona Basin, 5-7.5 in Baltic Proper and ~2-4 in Bothnian Bay (Andersen et al. 2017).

Fig 2. Light micrographs of *Chaetoceros muelleri* Lemmermann in the culture revived from the sediment at 10-11 cm depth. A-D. Vegetative cells in valve view (A-B Smooth solitary cell) and girdle view (C-D showing convex valve shape). Note that both vegetative cell and resting spore is visible in D. E-H. Resting spores in girdle view showing various characteristic morphologies. Scale bar A-D 20 microns, E-H 5 microns.

Fig. 3. Stratigraphic time markers in cores M0063I (mercury - Hg) and M0063H (Hg and artificial radionuclides <sup>137</sup>Cs and <sup>241</sup>Am) following the approach described in Moros et al. (2017). Core correlation is based on Hg downcore profiles in M0063I (black) and M0063H (grey) which are shown versus respective core depths. In addition, total organic carbon (TOC, blue) and carbonate (light blue) data of M0063H are shown. Hg (dark green) and <sup>137</sup>Cs (black, right) are normalized to TOC as the manganese-carbonate layers dilute the signals. Horizontal dashed red line marks an age of c. AD 1940 which can be assigned to this depth.

Fig. 4. Lithology and *Chaetoceros* spp. resting spore concentrations (million valves per gram dry sediment) in the upper 30 meter sediments of IODP Exp. 347 hole M0063D (Landsort Deep). The high concentrations of MCA and HTM ages are recorded in laminated organic rich clays (equals to hypoxic bottom water conditions).

Fig. 5. (A) Germination of resting spores of *Chaetoceros* sp. (B) Germination rate of the resting spores from the three ages.

Fig. 6. Sequences and alignment of the rbcL and SSU rDNA of *Chaetoceros muelleri*.

795

## Tables.

Table 1. AMS radiocarbon dates and calibrated ages of bulk sediment samples from Expedition 347, site M0063, hole C and D.

| Laboratory ID | Site and hole | Sample ID IODP | Depth (mcd) | <sup>14</sup> C Age | Error | Calibrated age 2 sigma range |      |      |
|---------------|---------------|----------------|-------------|---------------------|-------|------------------------------|------|------|
|               |               |                |             |                     |       | median                       | min  | max  |
| Core top      |               |                | 0           |                     |       | -63                          |      |      |
| Beta 418207   | M0063C        | 347-25772      | 5.22        | 1760                | 30    | 962                          | 577  | 1373 |
| Beta 418209   | M0063C        | 347-25774      | 6.22        | 1900                | 30    | 1301                         | 872  | 1768 |
| Beta 418041   | M0063D        | 347-28991      | 15.65       | 4590                | 30    | 4385                         | 3690 | 4966 |
| Beta 418042   | M0063D        | 347-29274      | 17.29       | 5120                | 30    | 5077                         | 4533 | 5578 |
| Beta 418043   | M0063D        | 347-29319      | 20.13       | 5480                | 30    | 5612                         | 5066 | 6154 |
| Beta 418046   | M0063D        | 347-30771      | 27.45       | 7380                | 30    | 7604                         | 7040 | 8099 |

800

Table 2. Calibrated ages modelled for the diatom samples analyzed of MCD and HTM age.

| Site and hole | Sample ID IODP | Depth mcd | Calibrated age 2 sigma range |      |      |
|---------------|----------------|-----------|------------------------------|------|------|
|               |                |           | median                       | min  | max  |
| M0063C        | 347-39293      | 5.42      | 1030                         | 693  | 1416 |
| M0063C        | 347-39299      | 6.02      | 1233                         | 854  | 1641 |
| M0063C        | 347-39300      | 6.12      | 1267                         | 864  | 1703 |
| M0063C        | 347-39301      | 6.22      | 1301                         | 872  | 1768 |
| M0063C        | 347-39302      | 6.32      | 1335                         | 880  | 1833 |
| M0063D        | 347-29645      | 21.63     | 6022                         | 5579 | 6459 |
| M0063D        | 347-29748      | 21.83     | 6076                         | 5653 | 6499 |
| M0063D        | 347-29750      | 23.74     | 6595                         | 6234 | 6950 |
| M0063D        | 347-30184      | 24.07     | 6685                         | 6321 | 7035 |
| M0063D        | 347-30204      | 26.05     | 7223                         | 6760 | 7640 |

805

Table 3. Sequence results of rRNA (SSU) molecules and chloroplast genes (rbcL) of three unialgal cultures.

| Unialgal culture | Marker        | Orientation | Nucleotide sequence    | Target gene | Length (bp) |
|------------------|---------------|-------------|------------------------|-------------|-------------|
| 3                | Dt-rbcL-F56   | Forward     | AGTGACCGTTACGAATCTGG   | rbcL        | 980         |
| 3                | Dt-rbcL-R1010 | Reverse     | AGGATCACCTTCTAATTTACC  | rbcL        | 962         |
| 1                | Cy18F150      | Forward     | GCTAATACATGCATCAATACC  | SSU         | 406         |
| 1                | 18R560        | Reverse     | GCTATTGGAGCTGGAATTACC  | SSU         | 410         |
| 3                | Cy18F150      | Forward     | GCTAATACATGCATCAATACC  | SSU         | 406         |
| 3                | 18R560        | Reverse     | GCTATTGGAGCTGGAATTACC  | SSU         | 406         |
| 1                | Dt18F150      | Forward     | ATACCCGTAGTAATTCTAGAGC | SSU         | 550         |
| 1                | 18R560        | Reverse     | GCTATTGGAGCTGGAATTACC  | SSU         | 420         |
| 2                | Dt18F150      | Forward     | ATACCCGTAGTAATTCTAGAGC | SSU         | 545         |
| 2                | 18R560        | Reverse     | GCTATTGGAGCTGGAATTACC  | SSU         | 54          |

810

815

820

825

830

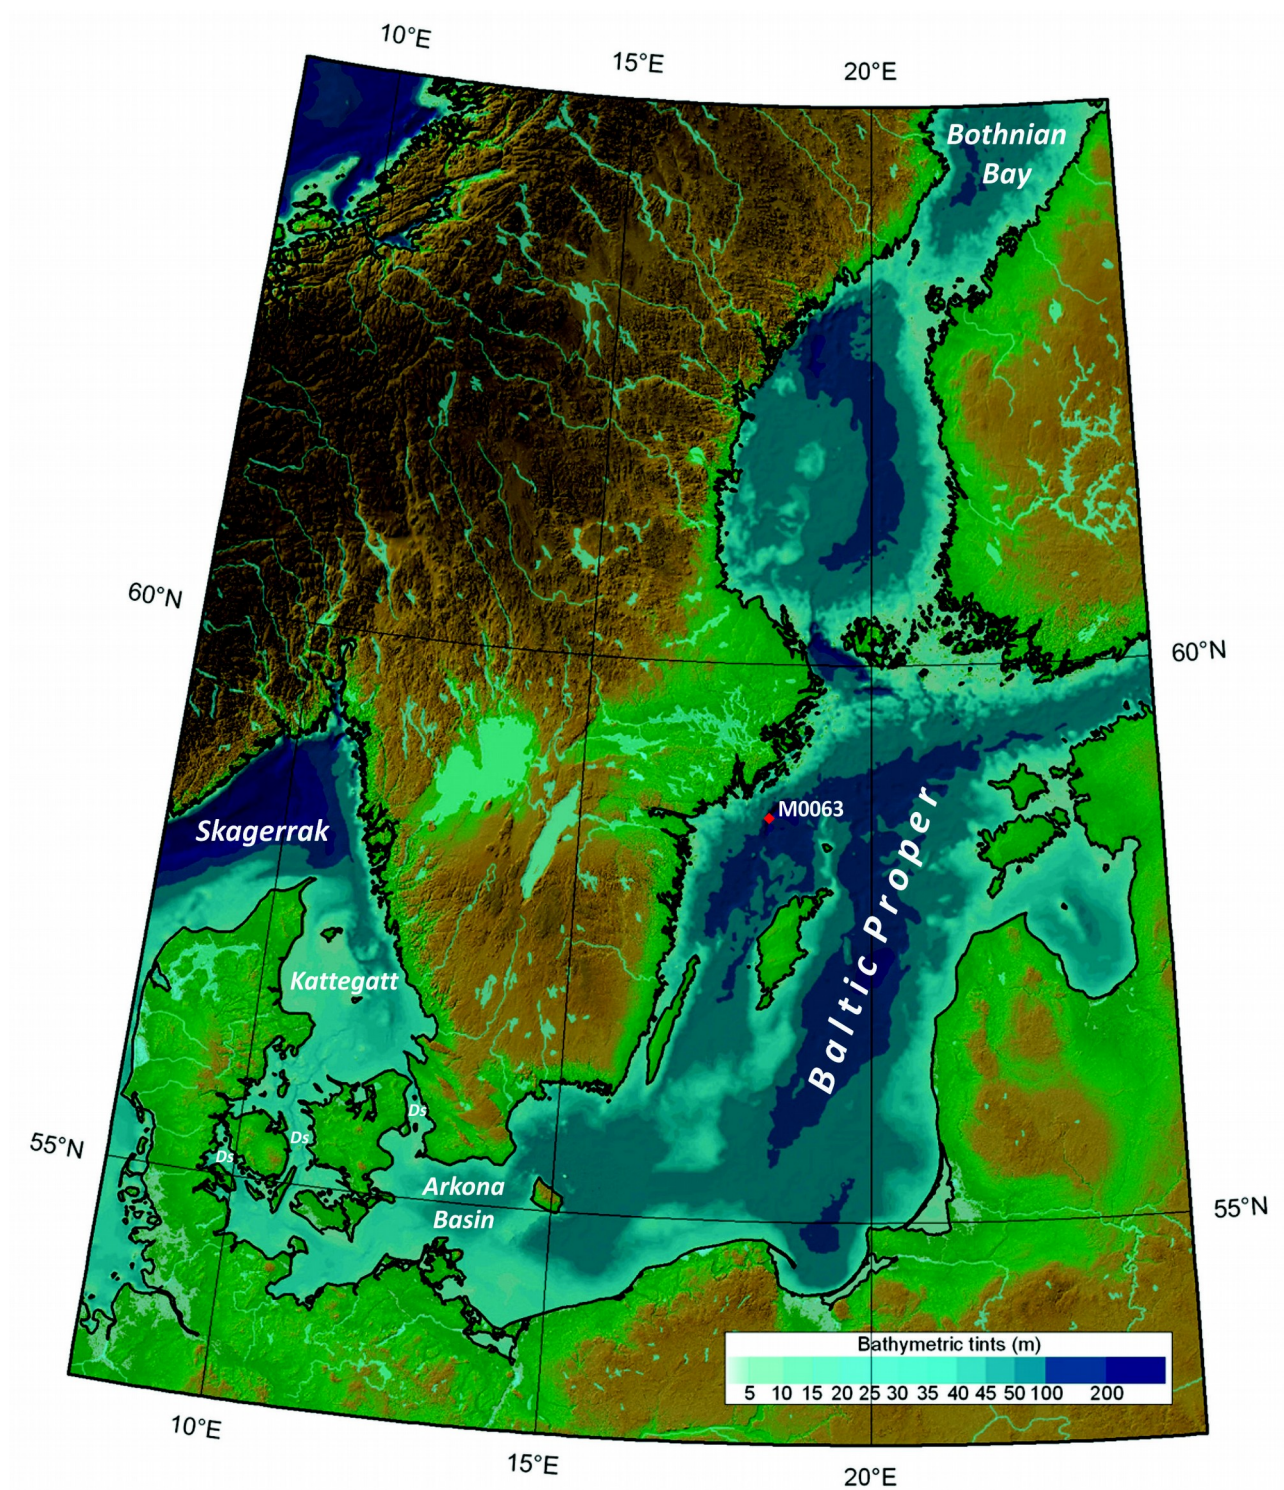

Fig. 1.

840

845



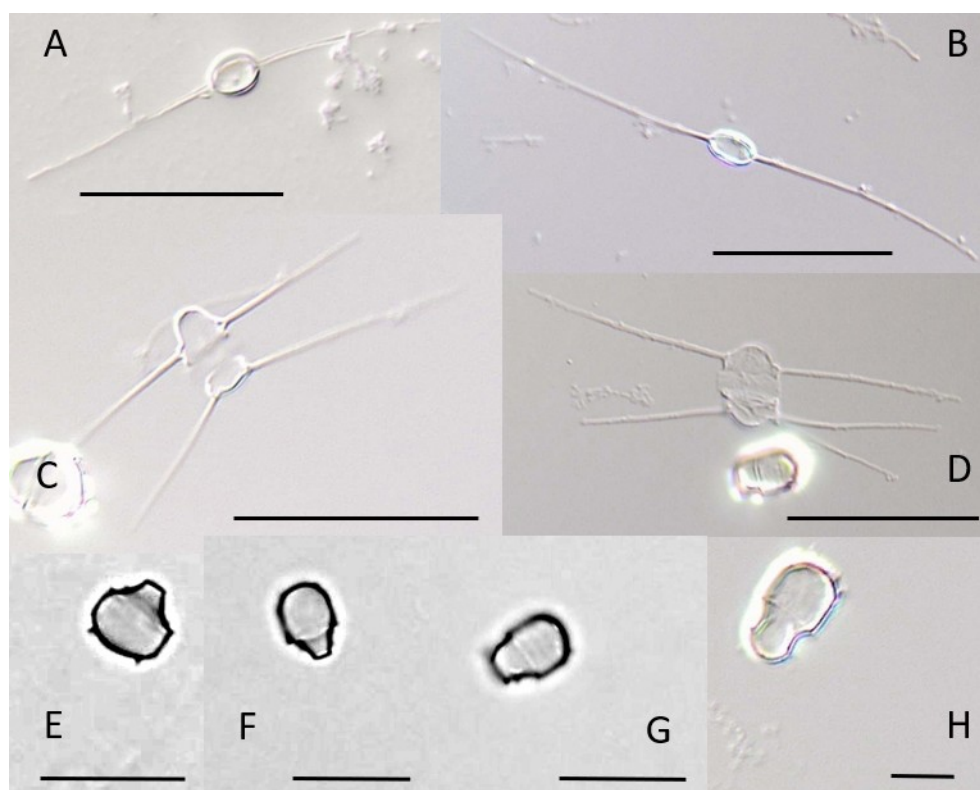

Fig. 2.

885 Fig. 3.

890

895

900

905

910

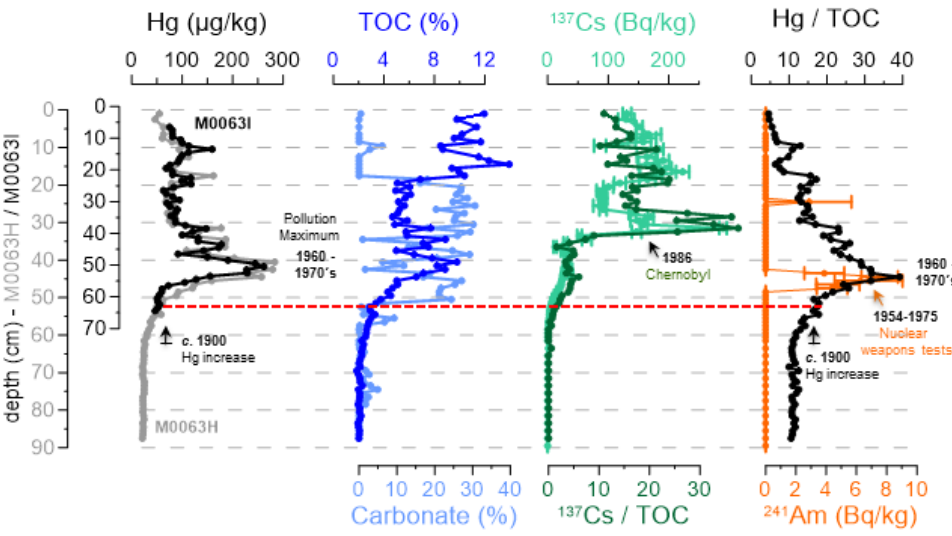

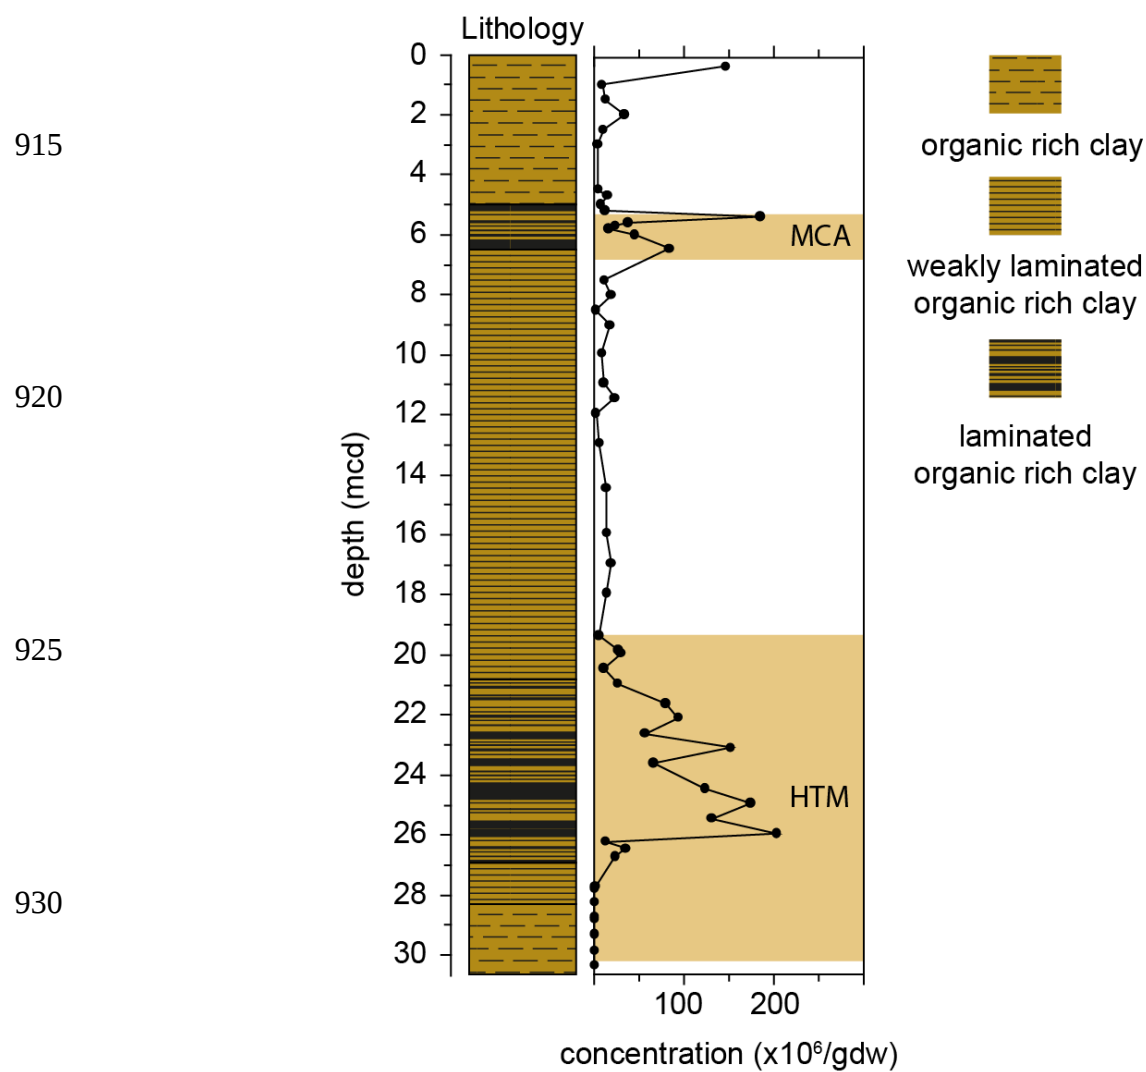

Fig. 4.



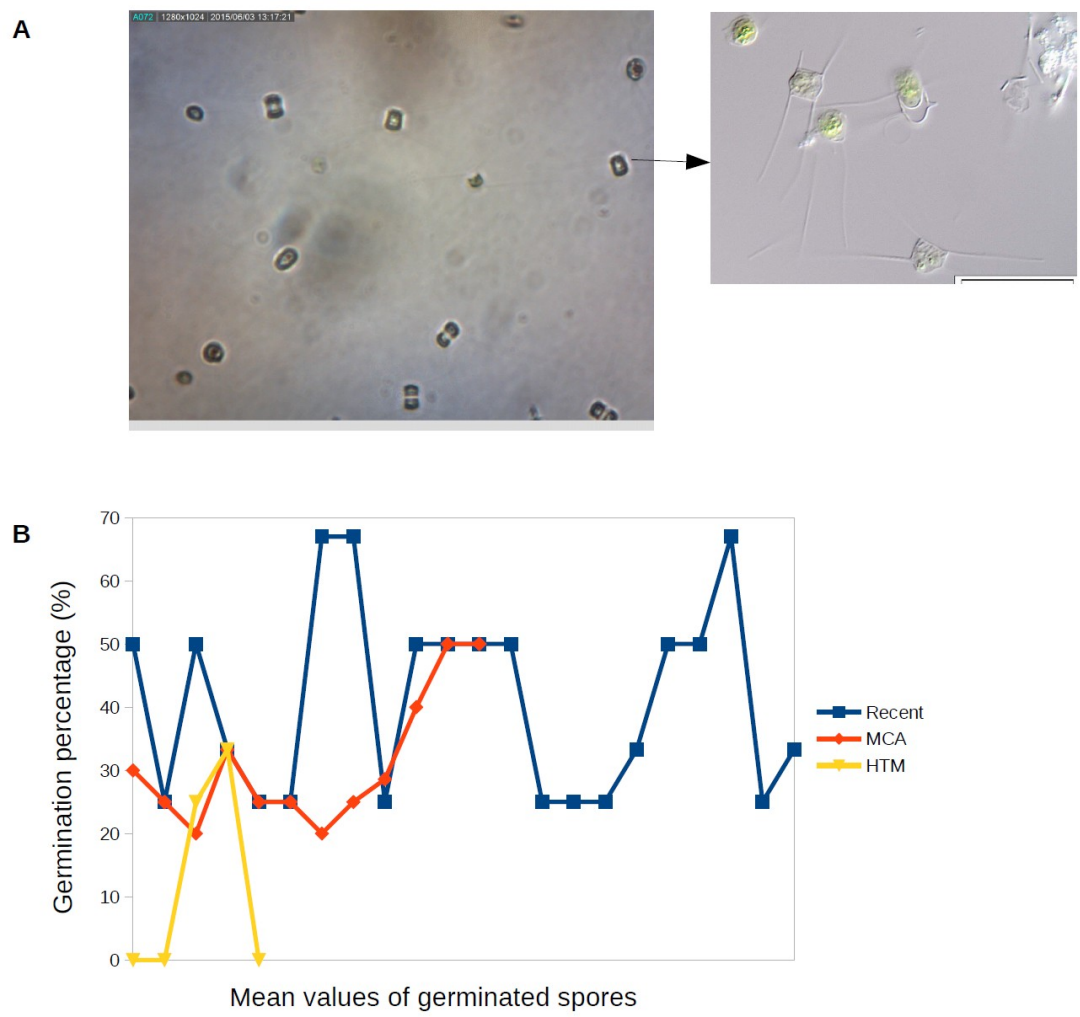

Fig. 5.

940

945

950

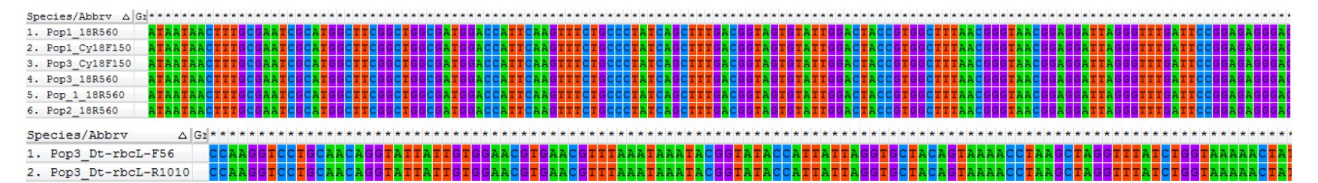

Fig. 6.
